# Supplementary material
Source: PubMed Central journal article supplement (PMC5552428)

**SUPPLEMENTRY MATERIAL****Supplementary Table 1. Antibodies used in the study**

|                      | <b>Antibody</b>                              | <b>Company<sup>1</sup></b> | <b>Catalog Number</b> | <b>Fluorochrome<sup>2</sup></b> |
|----------------------|----------------------------------------------|----------------------------|-----------------------|---------------------------------|
| <b>Surface</b>       | anti-mouse CD19                              | BL                         | 115530                | APC-Cy7                         |
|                      | anti-mouse CD19                              | SB                         | 1575-17               | PE-Cy7                          |
|                      | anti-mouse CD19                              | SB                         | 1575-09L              | PE                              |
|                      | anti-mouse IgM, F(ab') <sub>2</sub>          | SB                         | 1140-02               | FITC                            |
|                      | anti-mouse IgM, F(ab') <sub>2</sub>          | JI                         | 115-006-020           | -                               |
| <b>Intracellular</b> | anti-Akt (phospho T308)                      | CST                        | 13842                 | PE                              |
|                      | anti-Akt (phospho S473)                      | CST                        | 4075                  | AF647                           |
|                      | anti-Btk (phosphoY223)/Itk (phospho Y180)    | BD                         | 562753                | PE                              |
|                      | anti-Btk (total)                             | CST                        | 8547                  | -                               |
|                      | anti-CD79 $\alpha$ (phospho Y182)            | CST                        | 5173S                 | -                               |
|                      | anti-Erk 1/2 (phospho T202/Y204)             | CST                        | 9101                  | -                               |
|                      | anti-Myc (total)                             | CST                        | 14426                 | PB                              |
|                      | anti-Nf $\kappa$ B p65 (phospho S536)        | CST                        | 5733                  | PE                              |
|                      | anti-p38 MAPK (phospho T180/Y182)            | CST                        | 4511                  | -                               |
|                      | anti-PLC $\gamma$ 2 (phospho Y759)           | BD                         | 558498                | AF647                           |
|                      | anti-PLC $\gamma$ 2 (phospho Y1217)          | CST                        | 3871                  | -                               |
|                      | anti-S6 ribosomal protein (phospho S235/236) | CST                        | 8520                  | PB                              |
|                      | anti-Syk (phospho Y525/526)                  | CST                        | 2710P                 | -                               |
| <b>2°</b>            | anti-rabbit IgG (H+L), F(ab') <sub>2</sub>   | CST                        | 4414                  | AF647                           |

<sup>1</sup>Biologend (BL); Southern Biotech (SB); Jackson ImmunoResearch (JI); Cell Signaling Technology (CST); BD Biosciences (BD).

<sup>2</sup>allophycocyanin (APC); cyanine (CY), R-phycoerythrin (PE); fluorescein isothiocyanate (FITC); AlexaFluor 647 (AD647); Pacific Blue (PB).

**Supplementary Figure Legends**

**Supplementary Figure S1. Myc levels are elevated in E $\mu$ -myc B cells.** Intracellular flow cytometry of Myc protein levels in IgM<sup>+</sup>CD19<sup>+</sup> splenic B cells from E $\mu$ -myc mice and wild-type littermates (n=3 of each genotype). Mean fluorescence intensity, MFI; error bars are SEM; \*p=0.004.

**Supplementary Figure S2. Increased phosphorylation of deep downstream signaling molecules in E $\mu$ -myc B cells.** Activation of deep downstream signaling molecules were evaluated in splenic B cells from E $\mu$ -myc mice and non-transgenic littermates by intracellular phospho-flow cytometry at intervals after ligation of IgM with or without the addition of H<sub>2</sub>O<sub>2</sub>. Mean fluorescence intensity (MFI) for Erk1/2 pT203/Y205 (top), p38MAPK pT180/Y182 (middle), and NF- $\kappa$ B p65 pS536 (bottom) are indicated; error bars are SEM; p-values compare levels of phospho-protein in E $\mu$ -myc and wild-type splenic B cells with H<sub>2</sub>O<sub>2</sub> (dashed lines); \*p $\leq$ 0.01, \*\*p $\leq$ 0.03, and \*\*\*p $\leq$ 0.05 (p values for other comparisons not denoted).

**Supplementary Figure S3. Dose-dependent inhibition of Plc $\gamma$ 2 and Erk1/2 phosphorylation by ibrutinib.** Splenic B cells from E $\mu$ -myc mice or wild-type littermates were incubated with increasing concentrations of ibrutinib. Levels of Plc $\gamma$ 2 pY759 were assessed by intracellular phospho-flow cytometry in cells at rest (A) or 10 minutes after BCR ligation (B). Basal (C) and anti-IgM stimulated (D) levels of Erk1/2 pT203/Y205 were similarly assessed, but H<sub>2</sub>O<sub>2</sub> was added immediately after BCR ligation to inhibit phosphatases. Each experiment was performed at least 3 times with 2-3 mice per genotype in each experiment with mean fluorescence intensity

(MFI) from one representative experiment shown. Error bars represent SEM; \* $p \leq 0.01$ , \*\* $p \leq 0.03$ , \*\*\* $p \leq 0.05$ .

**Supplementary Figure S4. Myc overexpressing non-transformed B cells have increased Plc $\gamma$ 2 Y1217 phosphorylation.** Plc $\gamma$ 2 pY1217 was measured by intracellular phospho-flow cytometry in splenic B cells incubated without or with ibrutinib prior to IgM ligation without (A) or with (B) H<sub>2</sub>O<sub>2</sub>. (A) Mean fluorescence intensities (MFI) prior to and 30 min after IgM ligation from one representative experiment. (B) MFI without and intervals after BCR ligation and H<sub>2</sub>O<sub>2</sub> addition (left) and histograms showing one representative mouse per genotype (right). Each protein was measured in at least three experiments with 3-4 mice of each genotype per experiment. Error bars represent SEM; A, \* $p \leq 0.002$ ; B, \* $p \leq 0.004$ . For B, p-values compare levels of phospho-protein in ibrutinib-treated E $\mu$ -myc and ibrutinib-treated wild-type splenic B cells (dashed lines); p values for other comparisons not denoted.

**Supplementary Figure S5. Dose dependent inhibition of Syk phosphorylation by ibrutinib.** Splenic B cells from E $\mu$ -myc mice or wild-type littermates were incubated with increasing concentrations of ibrutinib. Syk pY519/520 was assessed by intracellular phospho-flow cytometry either without (A) or 10 minutes after IgM ligation (B). Each experiment was performed at least 3 times with 2-3 mice per genotype in each experiment with mean fluorescence intensity (MFI) from one representative experiment shown. Error bars represent SEM; \* $p \leq 0.02$ , \*\*  $p \leq 0.002$ , \*\*\*  $p \leq 0.0003$ .

**Supplementary Figure S6. Evaluation of Syk inhibition by ibrutinib.** (A) Phospho-Syk levels were measured before (basal) and 10 minutes after BCR ligation (IgM-stimulated) in splenic B cells from *Btk*<sup>-/-</sup> mice pre-treated with the indicated ibrutinib concentration. Error bars represent SEM; lines denote the samples being compared for p-values; \*p≤0.035, \*\* p≤0.002. (B) Myc protein levels were assessed by intracellular flow cytometry 30 minutes after ligation of the BCR in wild-type and Eμ-*myc* B cells pre-treated with DMSO or 12.5 μM ibrutinib; error bars represent SEM. These experiments were performed at least twice with 3 mice per genotype in each experiment. A representative experiment is shown.

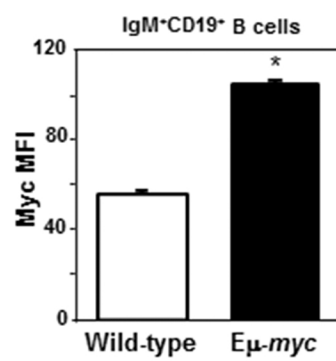

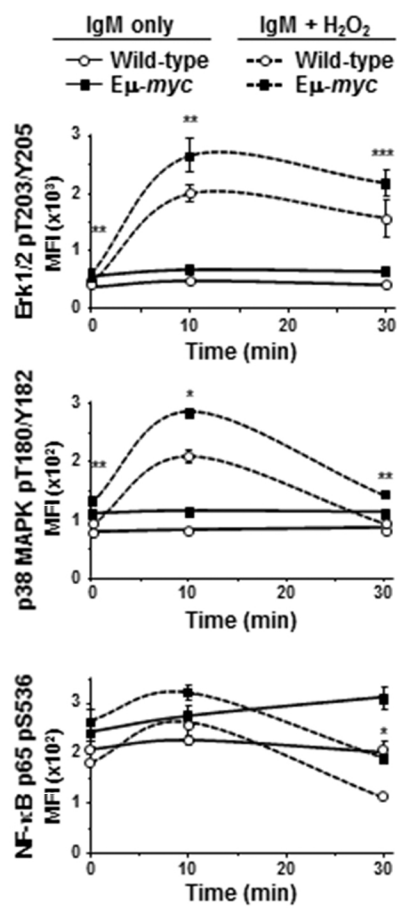

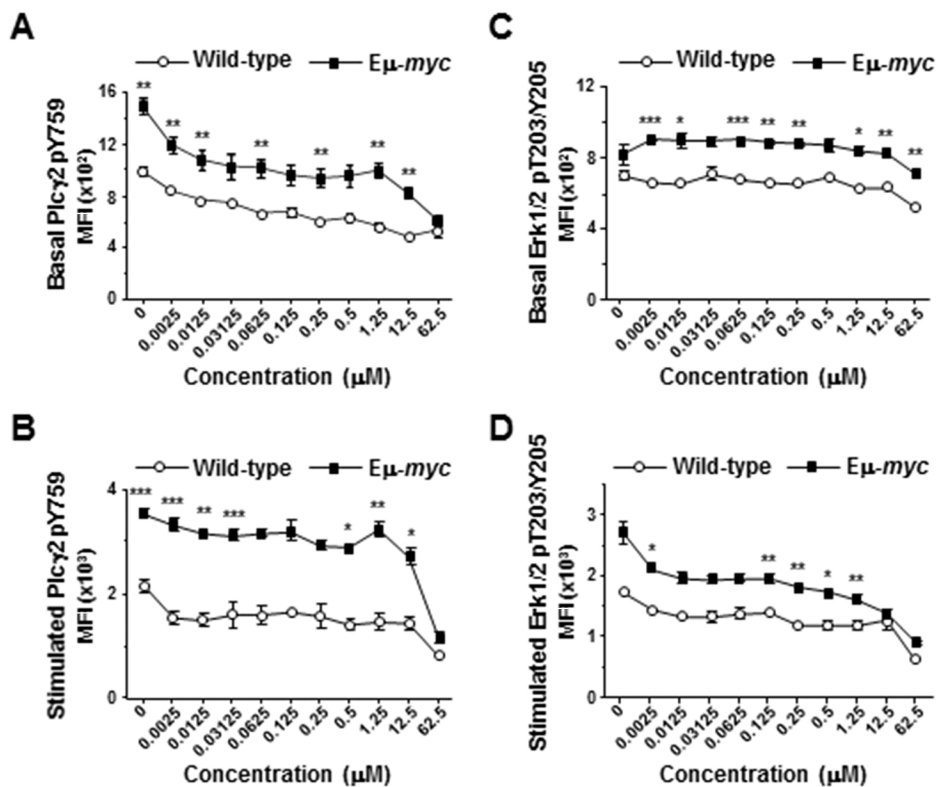

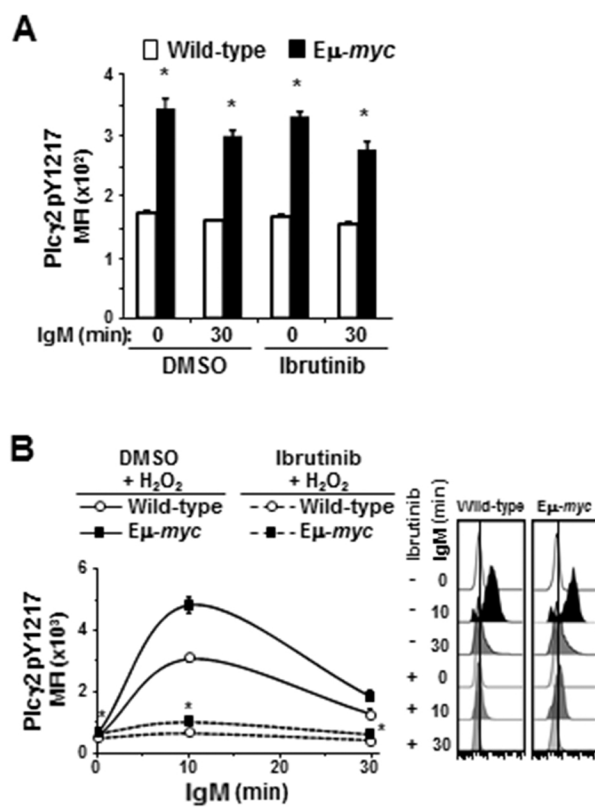



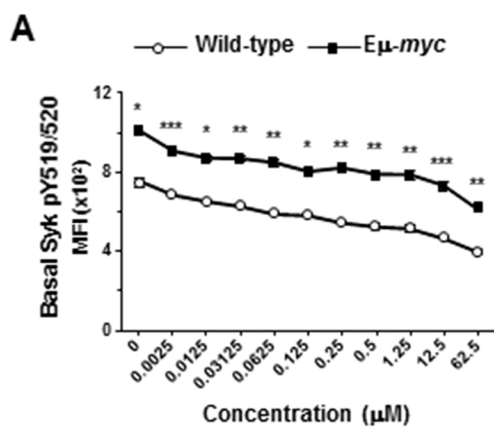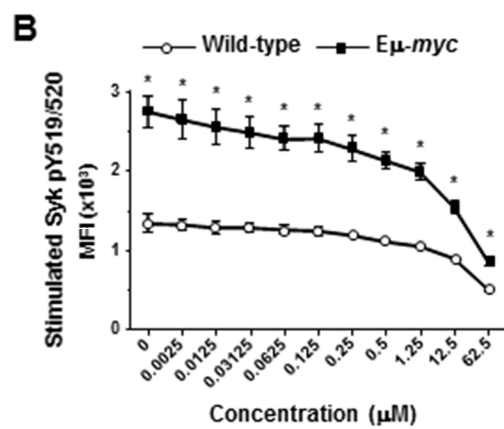

**A**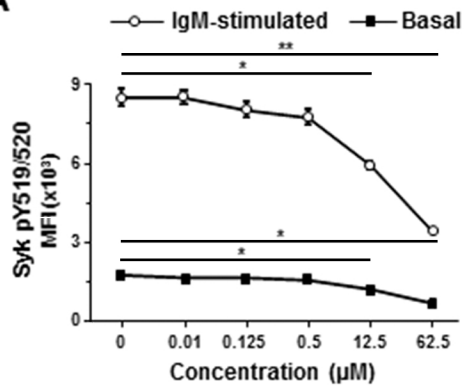**B**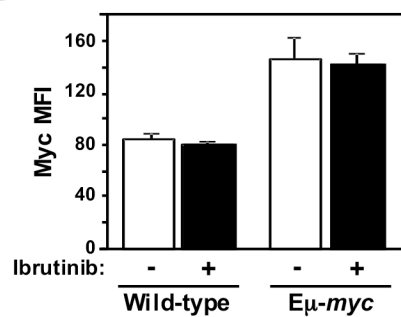

Supplement: NIHMS857884-supplement-1.pdf [file NIHMS857884-supplement-1.pdf]
